# Supplementary material for: Rational design of a MOF@Au@COF catalyst with electron synergy for the reduction of 4-nitrophenol
Source: Royal Society of Chemistry journal article supplement (doi:10.1039/d2nj06160k), 2023-01-01
Supplement: d2nj06160k1.pdf [file d2nj06160k1.pdf]

## Supplementary Material

### Rational design of MOFs@Au@COFs catalyst with electron synergy for reduction of 4-nitrophenol

Shangjin Liu<sup>#,a</sup>, Chunfeng Mao<sup>#,a</sup>, Chenghan Yang<sup>a</sup>, Pengda Hong<sup>\* ,b</sup> Min Zhu<sup>a</sup>,  
Yuming Zhou<sup>a</sup> and Yiwei Zhang<sup>\*,a</sup>

<sup>a</sup>School of Chemistry and Chemical Engineering, Southeast University, Jiangsu  
Optoelectronic Functional Materials and Engineering Laboratory, Nanjing 211189, PR  
China

<sup>b</sup>Hefei Xingyu Chemical Co, Ltd, PR China

\*Corresponding authors.

E-mail addresses: zhangchem@seu.edu.cn (Y. Zhang)

<sup>#</sup>These authors contributed equally to this work.



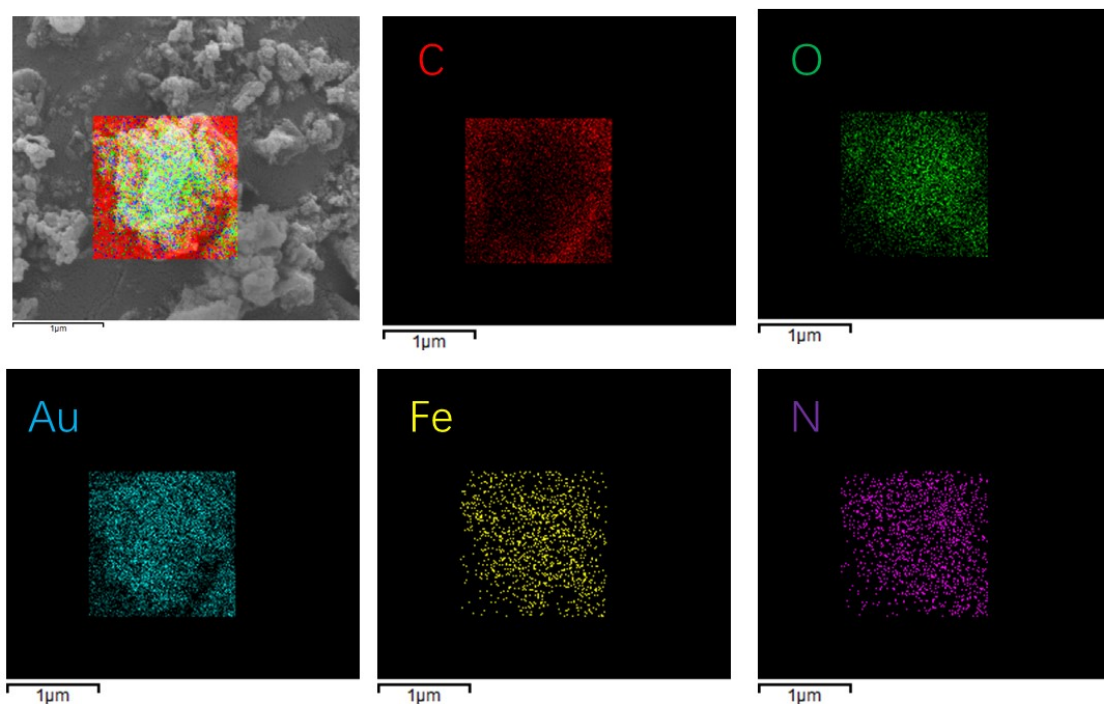

**Fig.S1** EDS images of  $\text{NH}_2\text{-MIL-88B(Fe)@Au@COFs}$  and analysis of C, O, Au, Fe and N elements

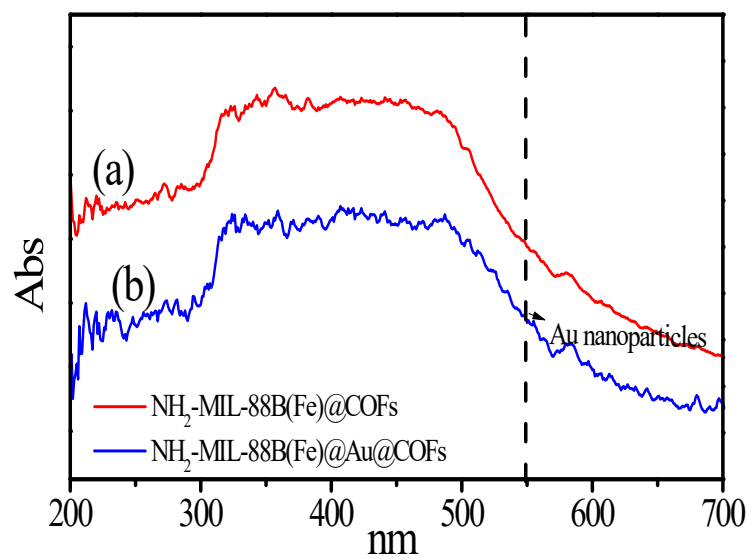

**Fig.S2** UV-vis spectra of (a) NH<sub>2</sub>-MIL-88B(Fe)@COFs and (b) NH<sub>2</sub>-MIL-88B(Fe)@Au@COFs

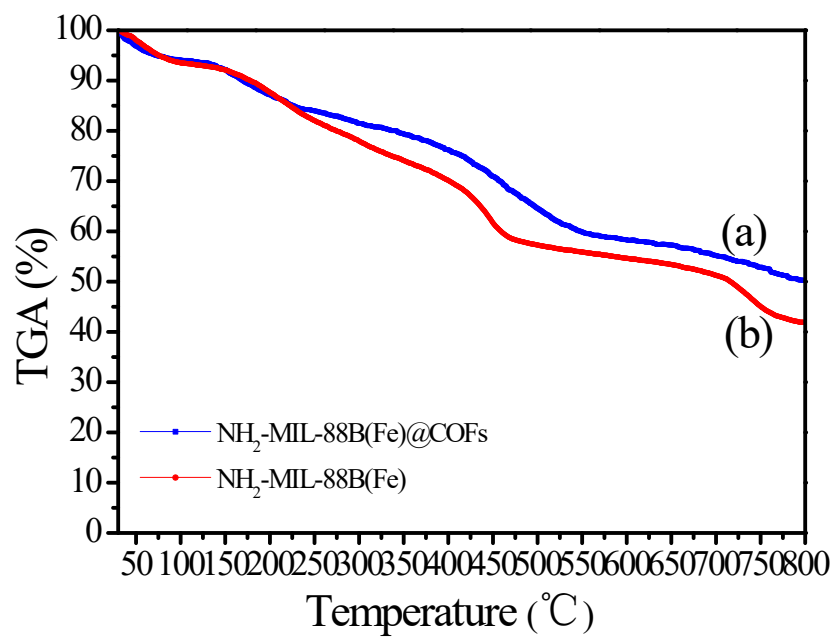

**Fig.S3** TGA analysis of (a) NH<sub>2</sub>-MIL-88B(Fe) @COFs and (b) NH<sub>2</sub>-MIL-88B(Fe)

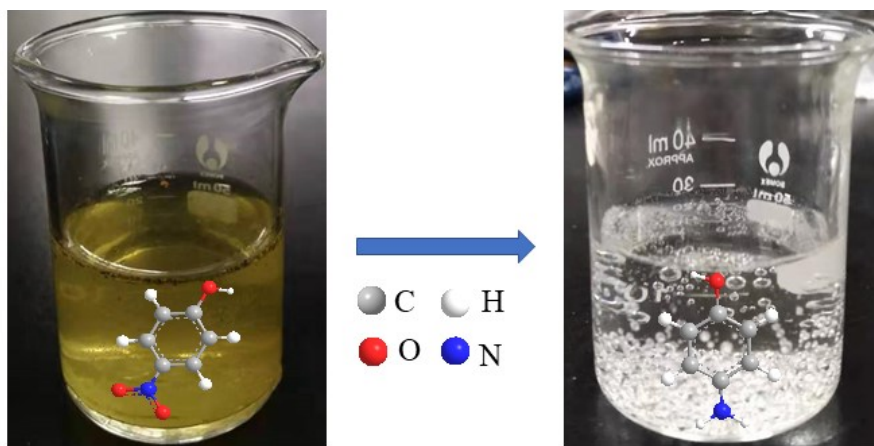

Before reaction at adding catalyst

After reaction at separating catalyst

**Fig.S4** The change of the solution color before and after the reaction at the amplification experiment process

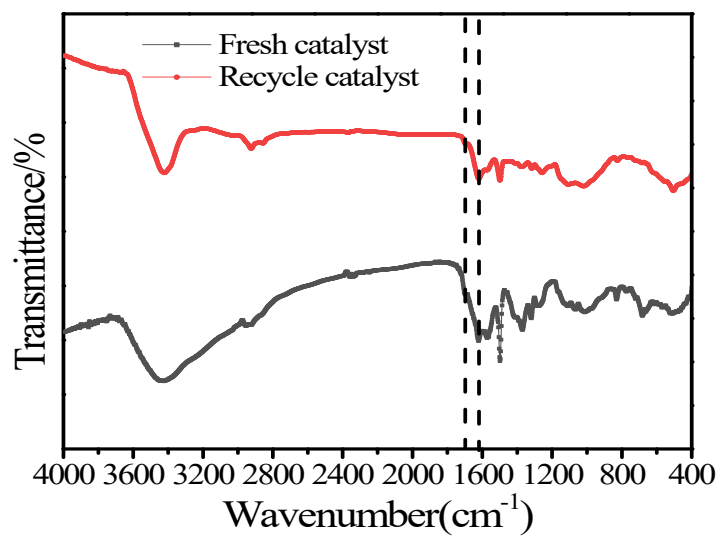

**Fig.S5** FT-IR spectra of fresh catalyst and recycle catalyst

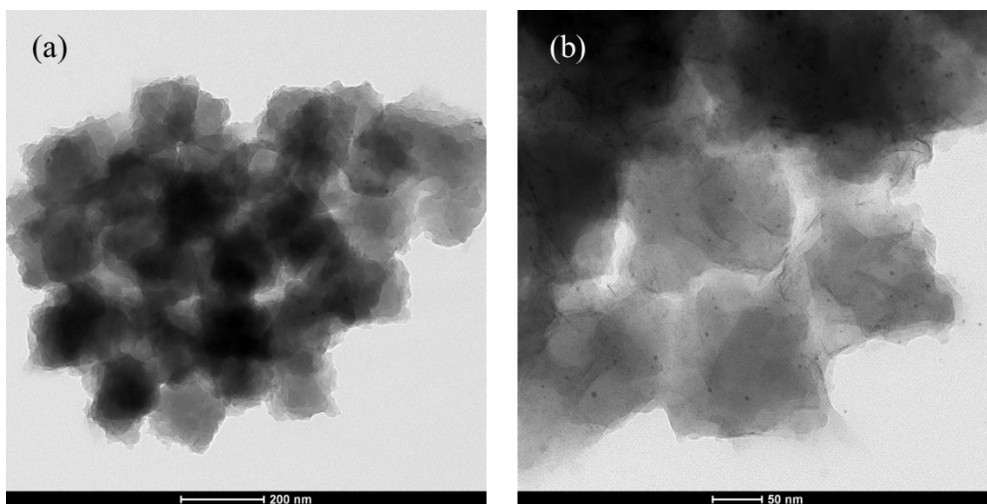

**Fig.S6** TEM images of (a)  $\text{NH}_2\text{-MIL-88B(Fe)@Au}$



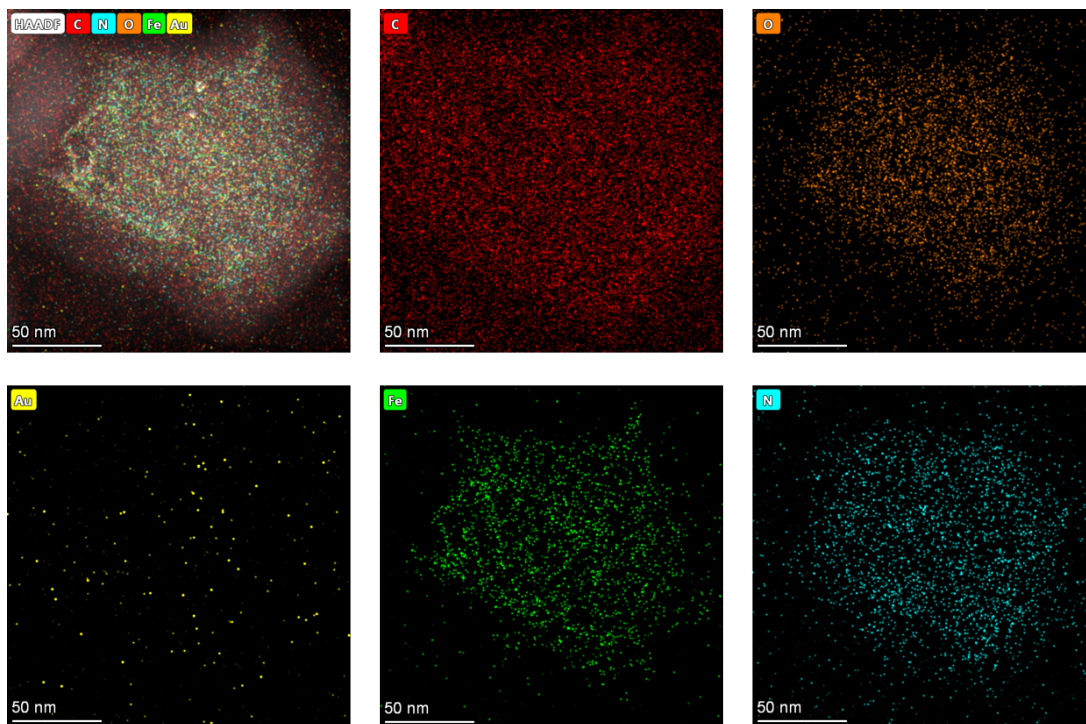

**Fig.S7** EDS images of NH<sub>2</sub>-MIL-88B(Fe)@Au and analysis of C, O, Au, Fe and N elements

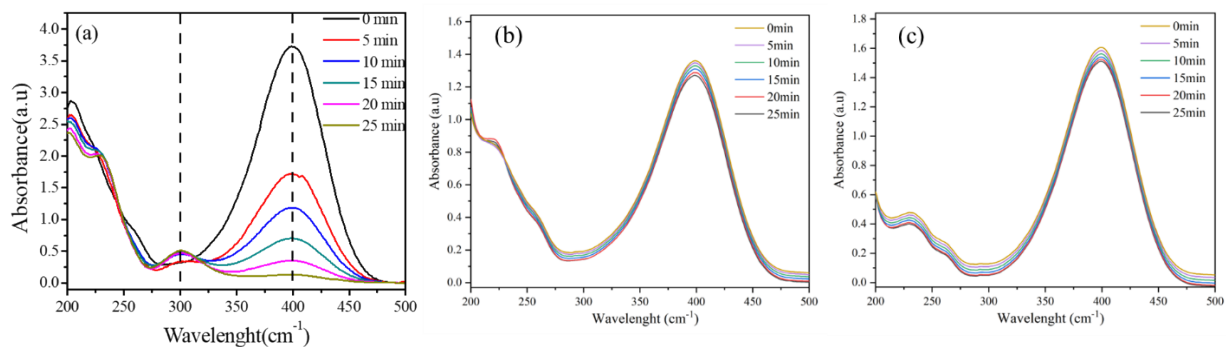

**Fig.S8** UV-vis absorption spectra: (a) catalytic reduction of 4-nitrophenol by NH<sub>2</sub>-MIL-88B(Fe)@Au@COFs; (b) the catalytic reduction of 4-nitrophenol by NH<sub>2</sub>-MIL-88B(Fe)@Au; (c) the catalytic reduction of 4-nitrophenol by NaBH<sub>4</sub> in the absence of catalyst.

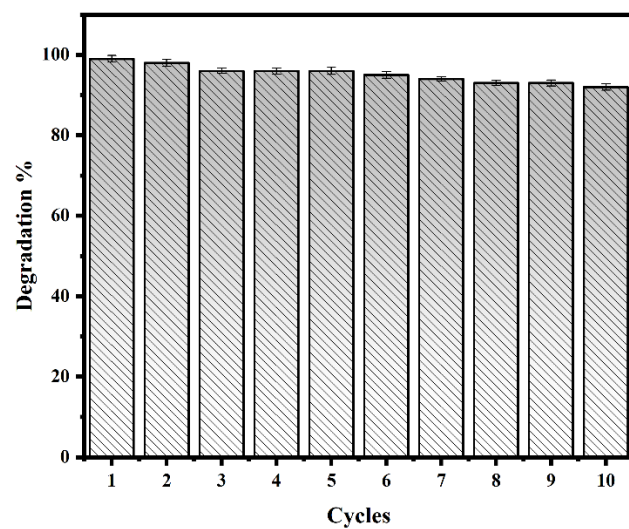

**Fig.S9** Reusability of synthesized catalyst [NH<sub>2</sub>-MIL-88B(Fe)@Au@COFs] for the reduction of 4NP in the presence of NaBH<sub>4</sub>.
